# Supplementary material for: Patient Preferences for Nonvitamin K Antagonist Oral Anticoagulants in Stroke Prevention: A Multicountry Discrete Choice Experiment
Source: Hindawi journal article supplement (doi:10.1155/2019/5719624), 2019-12-18
Supplement: f1 [file 5719624.f1.pdf]

## Supplementary Materials

Supplemental Figure 1: Example of a visualized DCE set

**Please choose between these two options**

**Option 4A**

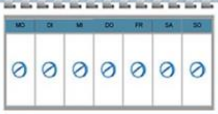

Medication must be taken once daily



Medication comes as a hard capsule (approx. 20 mm)



Medication can be taken with or without food



Treating physician is within a 10 km radius

**Option 4B**



Medication must be taken twice daily



Medication comes as a tablet (6 mm – 9 mm)



Medication must be taken with food



Treating physician is within a 1 km radius

Example of visualized applied choice sets. The DCE card shows two hypothetical NOAC alternatives derived from a combination of the defined attributes and their respective levels. Patients were required to decide between option A or B (no opt-out).

Supplemental Figure 2: Relative importance of NOAC treatment attributes

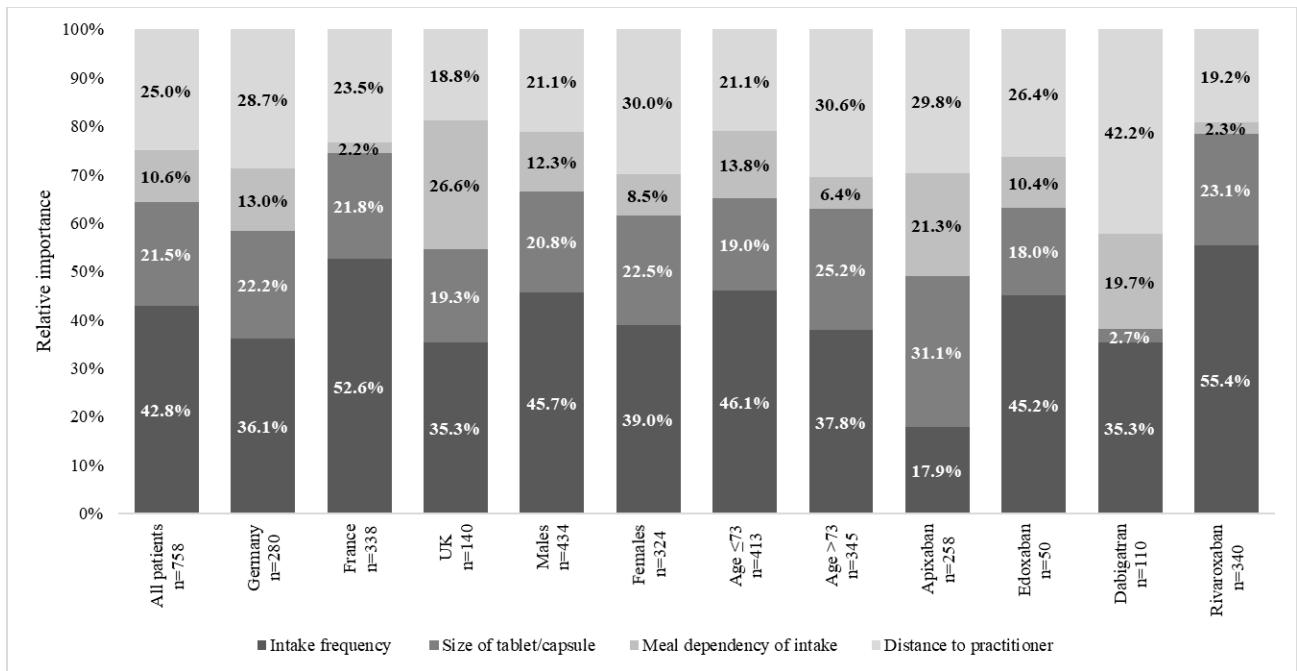

The figure shows the the relative importance of NOAC treatment attributes, estimated for the overall sample and for pre-specified subgroups. The DCE data were analyzed using logistic regression.
